# Supplementary material for: Na-doped Ga2O3 electrolyte-gated synaptic transistors for neuromorphic computing
Source: Royal Society of Chemistry journal article supplement (doi:10.1039/d5tc01248a), 2025-01-01
Supplement: d5tc01248a1.pdf [file d5tc01248a1.pdf]

## Supporting Information

### **Na-Doped Ga<sub>2</sub>O<sub>3</sub> Electrolyte-Gated Synaptic Transistors for Neuromorphic Computing**

Jierui Lin<sup>1</sup>, Shuqiong Lan<sup>1\*</sup>, Lan Yang<sup>1</sup>, Qiubao Lin<sup>1</sup>, Yayong Chen<sup>2</sup>, and Wangying Xu<sup>1\*</sup>

1. Department of Physics, School of Science, Jimei University, Xiamen 361021, China
2. Bridgelux Optoelectronics (Xiamen) Co., Ltd., Xiamen 361101, China

E-mail: [wyxu@jmu.edu.cn](mailto:wyxu@jmu.edu.cn); [shuqionglan@jmu.edu.cn](mailto:shuqionglan@jmu.edu.cn)

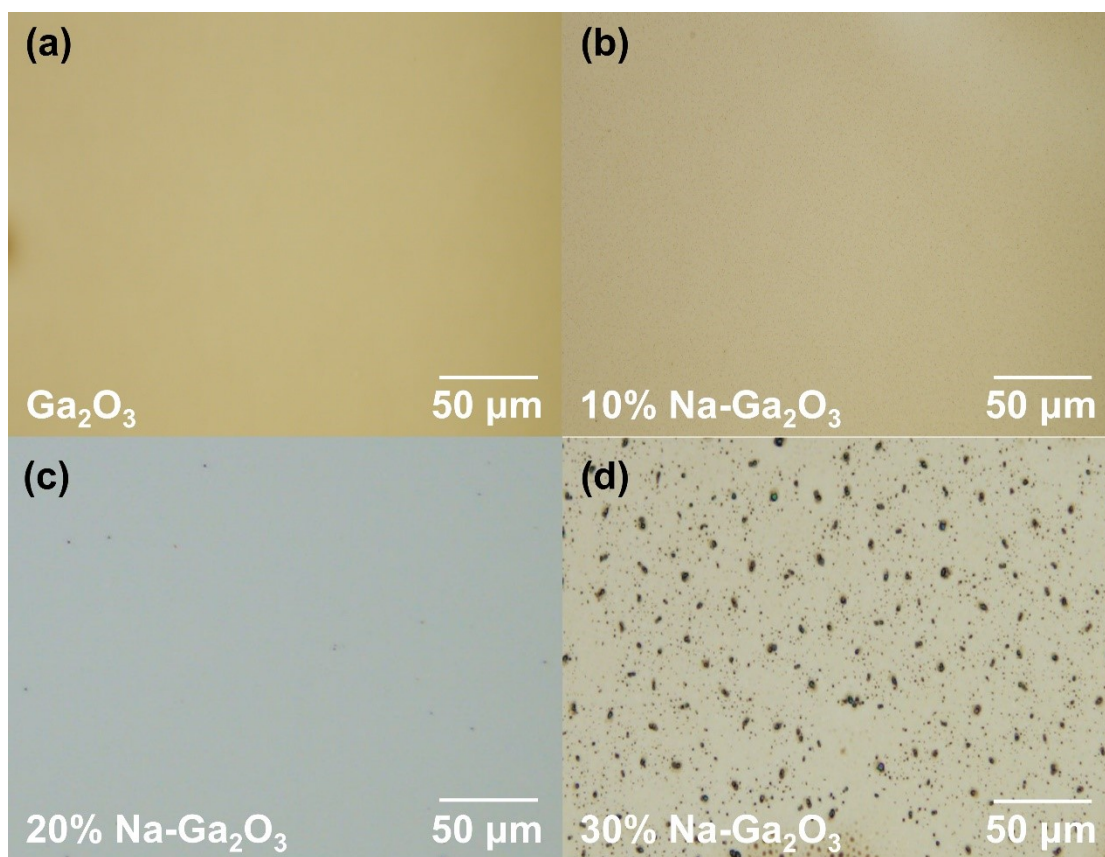

**Fig. S1.** Optical microscope images of (a) pristine, (b) 10% Na-doped, (c) 20% Na-doped, and (d) 30% Na-doped  $\text{Ga}_2\text{O}_3$  thin films.

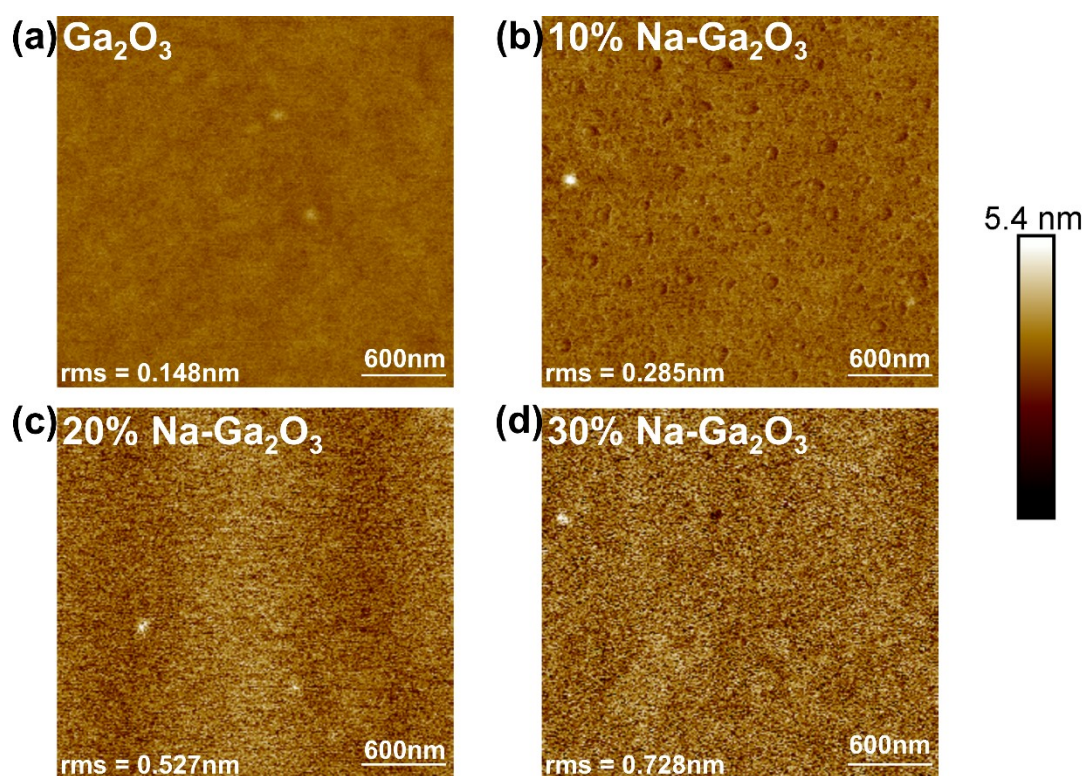

**Fig. S2.** AFM topography image of Na-doped  $\text{Ga}_2\text{O}_3$  thin films: (a) pristine, (b) 10% Na-doped, (c) 20% Na-doped, and (d) 30% Na-doped. All scan sizes are  $3\text{ }\mu\text{m} \times 3\text{ }\mu\text{m}$ .

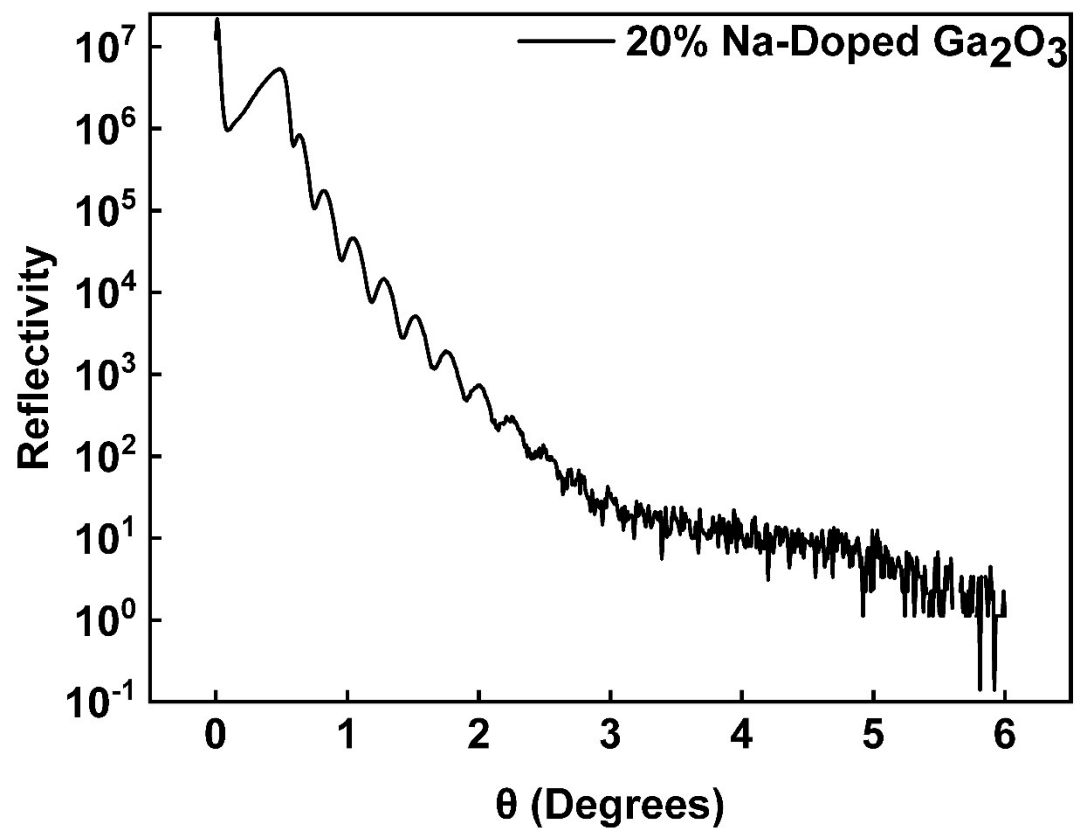

**Fig. S3.** XRR curve for the 20% Na-doped  $\text{Ga}_2\text{O}_3$  film.

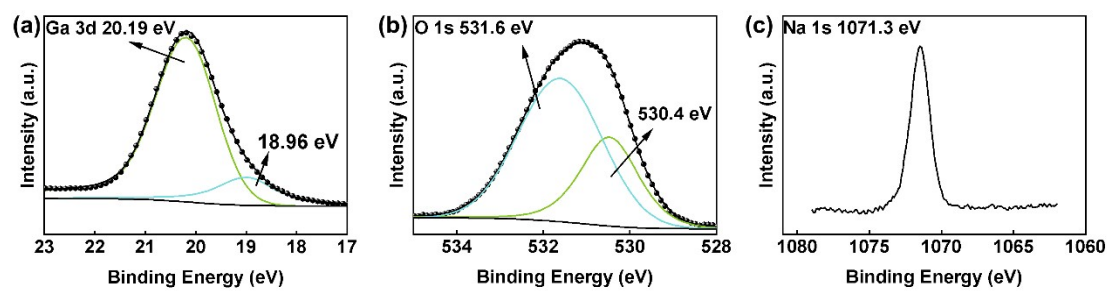

**Fig. S4.** XPS of Na-doped  $\text{Ga}_2\text{O}_3$  film. (a) Ga 3d. (b) O 1s. (c) Na 1s.

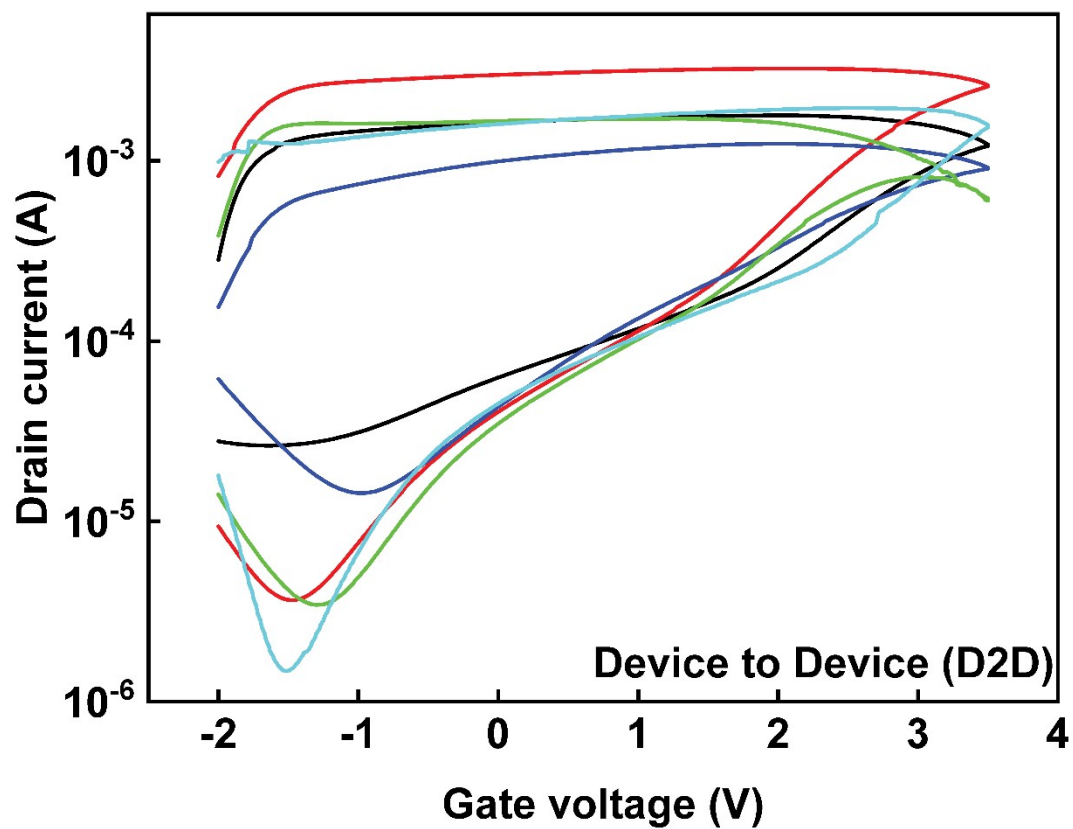

**Fig. S5.** The double sweep transfer curves of four different 20% Na-doped  $\text{Ga}_2\text{O}_3$  EGSTs.

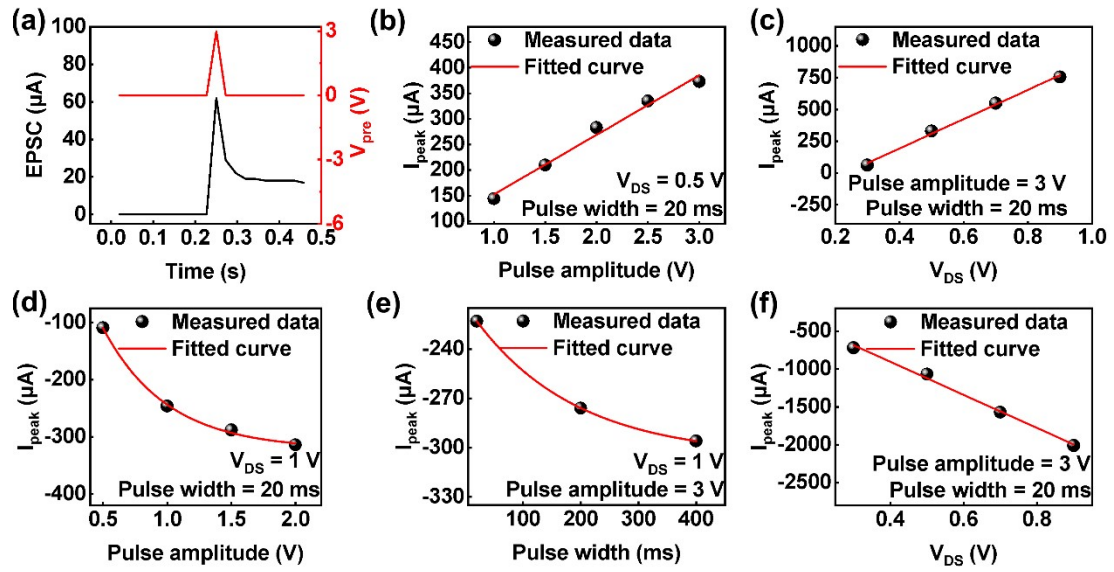

**Fig. S6.** (a) EPSC triggered by presynaptic spikes. EPSC peak current as a function of (b) pulse amplitude and (c)  $V_{DS}$ . IPSC peak current as a function of (d) pulse amplitude, (e) pulse width, and (f)  $V_{DS}$ .

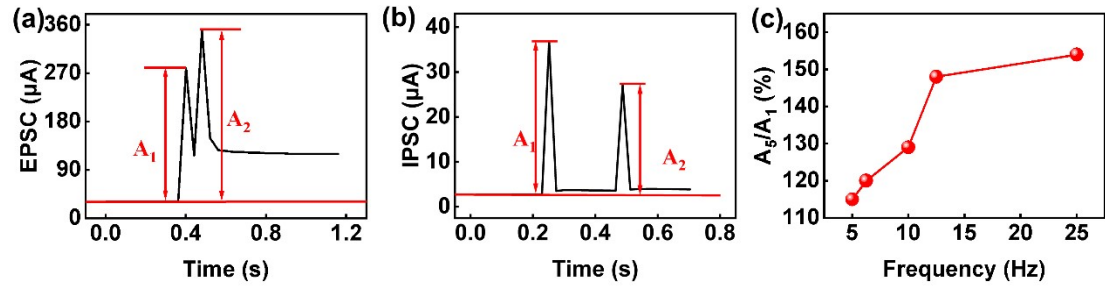

**Fig. S7.** (a) PPF triggered by a pair of presynaptic spikes. (b) PPD triggered by a pair of presynaptic spikes. (c) The variation of EPSC gain ( $A_5/A_1$ ) with pulse frequency.



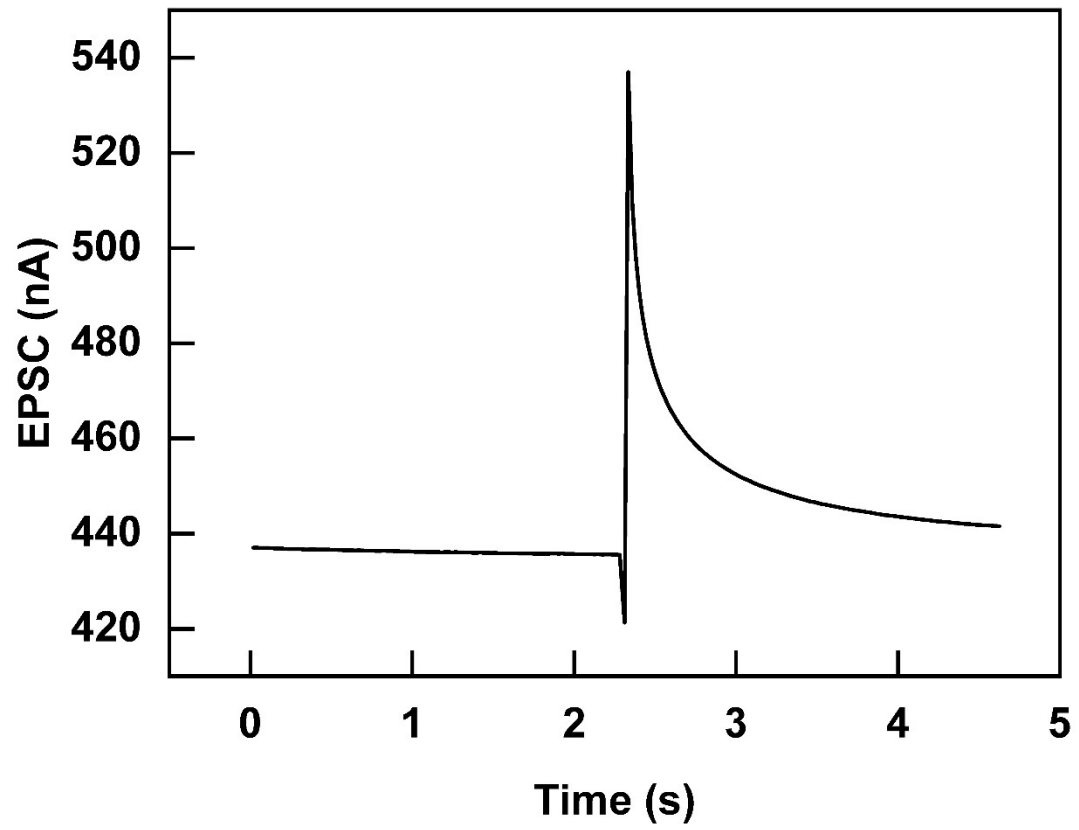

**Fig. S8.** EPSC stimulated by a single presynaptic pulse (2.5 V, 20 ms) at  $V_{DS} = 0.01V$ .

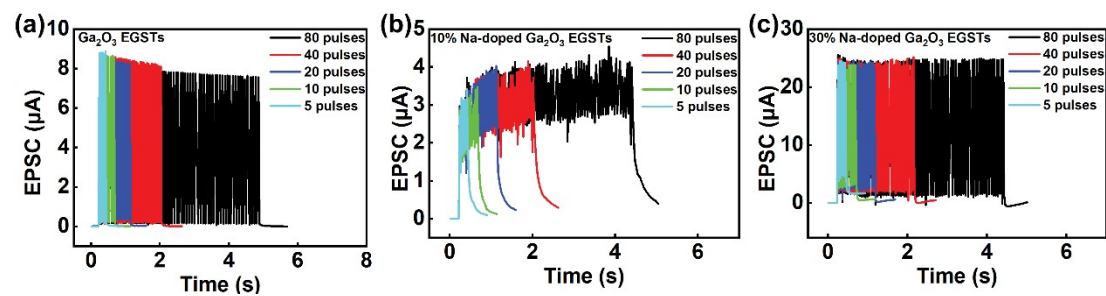

**Fig. S9.** EPSC response as a function of pulse number for (a)  $\text{Ga}_2\text{O}_3$ , (b) 10% Na-doped  $\text{Ga}_2\text{O}_3$ , and (c) 30% Na-doped  $\text{Ga}_2\text{O}_3$  EGSTs.
